# Supplementary material for: Facile synthesis of urchin-like LaWO4Cl assemblies and their near-infrared photothermal conversion
Source: Royal Society of Chemistry journal article supplement (doi:10.1039/c9nr03082d), 2019-01-01
Supplement: c9nr03082d1.pdf [file c9nr03082d1.pdf]

## **Facile Synthesis of Urchin-Like LaWO<sub>4</sub>Cl Assemblies and Their Near-Infrared**

### **Photothermal Conversion**

Lin Sun<sup>a</sup>, Yang Shi<sup>c</sup>, Mingcong Tang<sup>b</sup>, Dong Wang<sup>\*b</sup>, Yaping Tian<sup>\*c</sup>, Jing Li<sup>d</sup>

a. College of Chemistry, Jilin University, Changchun 130012, P. R. China.

b. Northeast Electric Power University, Jilin City 132012, P. R. China.

c. 1st Hospital of Jilin University, Changchun 130021, P.R. China.

d. Research Institute of Petrochina, Jilin Petrochemical Company, Jilin City 132012,  
P. R. China.

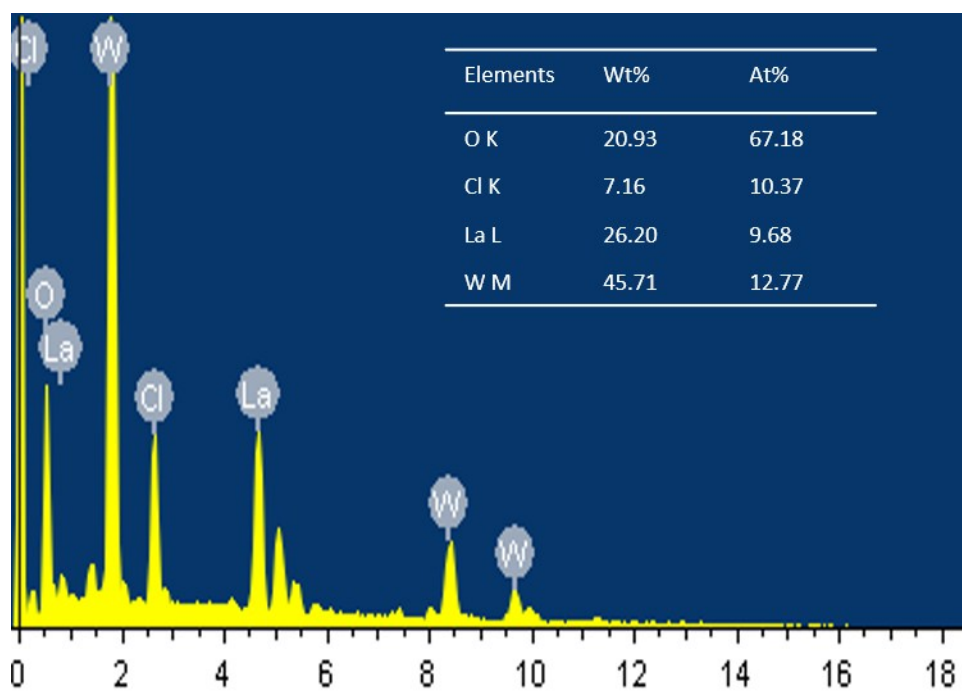

Fig S1 EDS spectrum of the urchin-like  $\text{LaWO}_4\text{Cl}$  assemblies

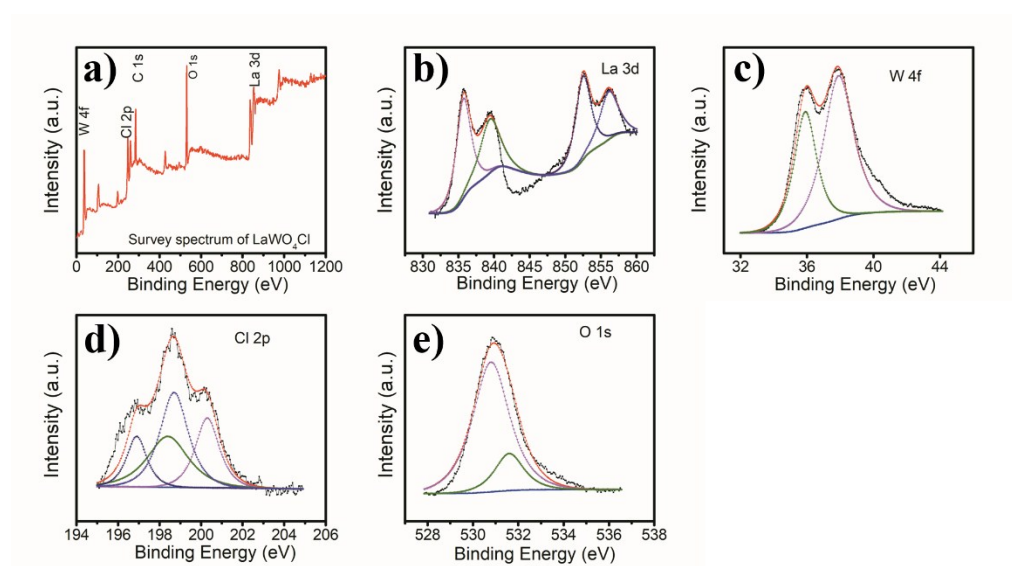

Fig S2 Detailed XPS spectrum of urchin-like  $\text{LaWO}_4\text{Cl}$  assemblies
